# Supplementary material for: Spatiotemporal analysis reveals significant overlap of key proepicardial markers in the developing murine heart
Source: bioRxiv or medRxiv preprint supplement (doi:10.1101/666610), 2019-06-11
Supplement: Supplementary file [file media-1.pdf]

Spatiotemporal analysis reveals significant overlap of key proepicardial markers in the developing murine heart

Irina-Elena Lupu\*, Andia N. Redpath\*, Nicola Smart#

## **Supplementary Information**

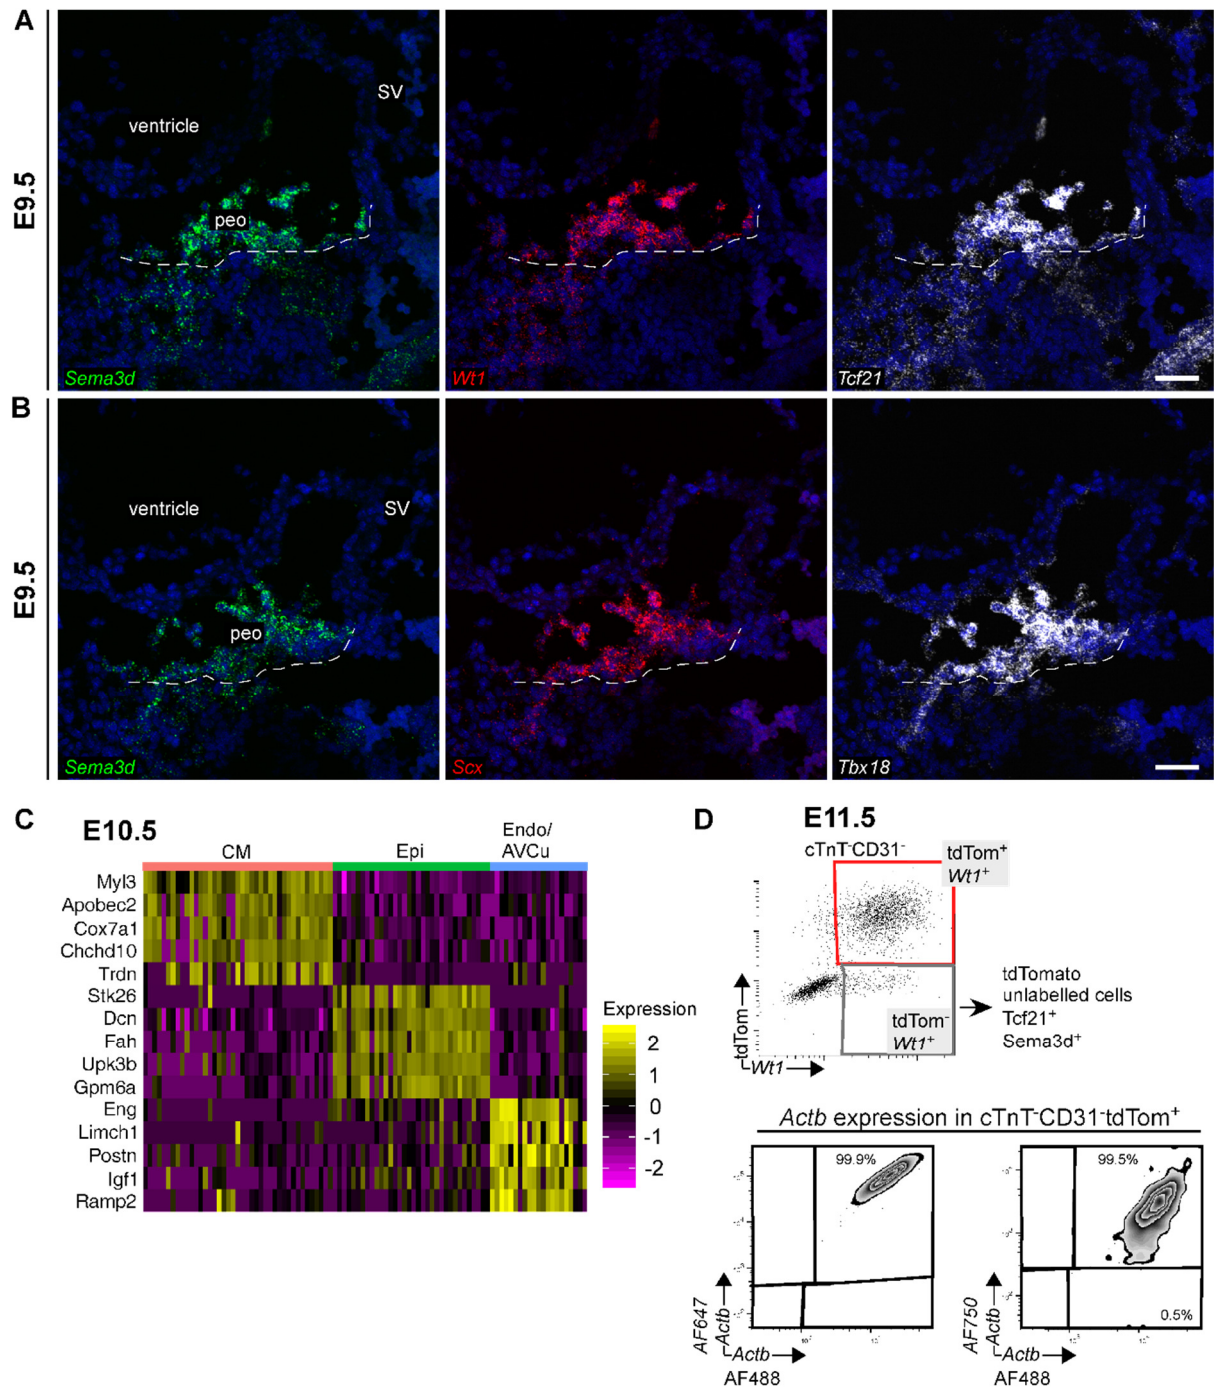

**Fig. S1. Gene expression of epicardial markers in the septum transversum region and confirmation of E10.5 scRNA-seq cluster identity.**

(A-B) RNA ISH staining of E9.5 embryo cryosections shows overlapping expression of *Sema3d*, (A) *Wt1*, *Tcf21*, (B) *Scx*, and *Tbx18* mRNA only in the proepicardial organ (dashed line) (n=5 embryos). (C) Heatmap of top 5 differentially expressed genes for each cluster in the E10.5 scRNA-Seq. High expression is indicated in yellow. (D) Flow cytometric analysis of *Wt1* and tdTomato at E11.5. Multiplex analysis of *Actb* expression in tdTomato<sup>+</sup> cells. peo, proepicardial organ; SV, sinus venosus. Scale bars: 50µm in A-B.

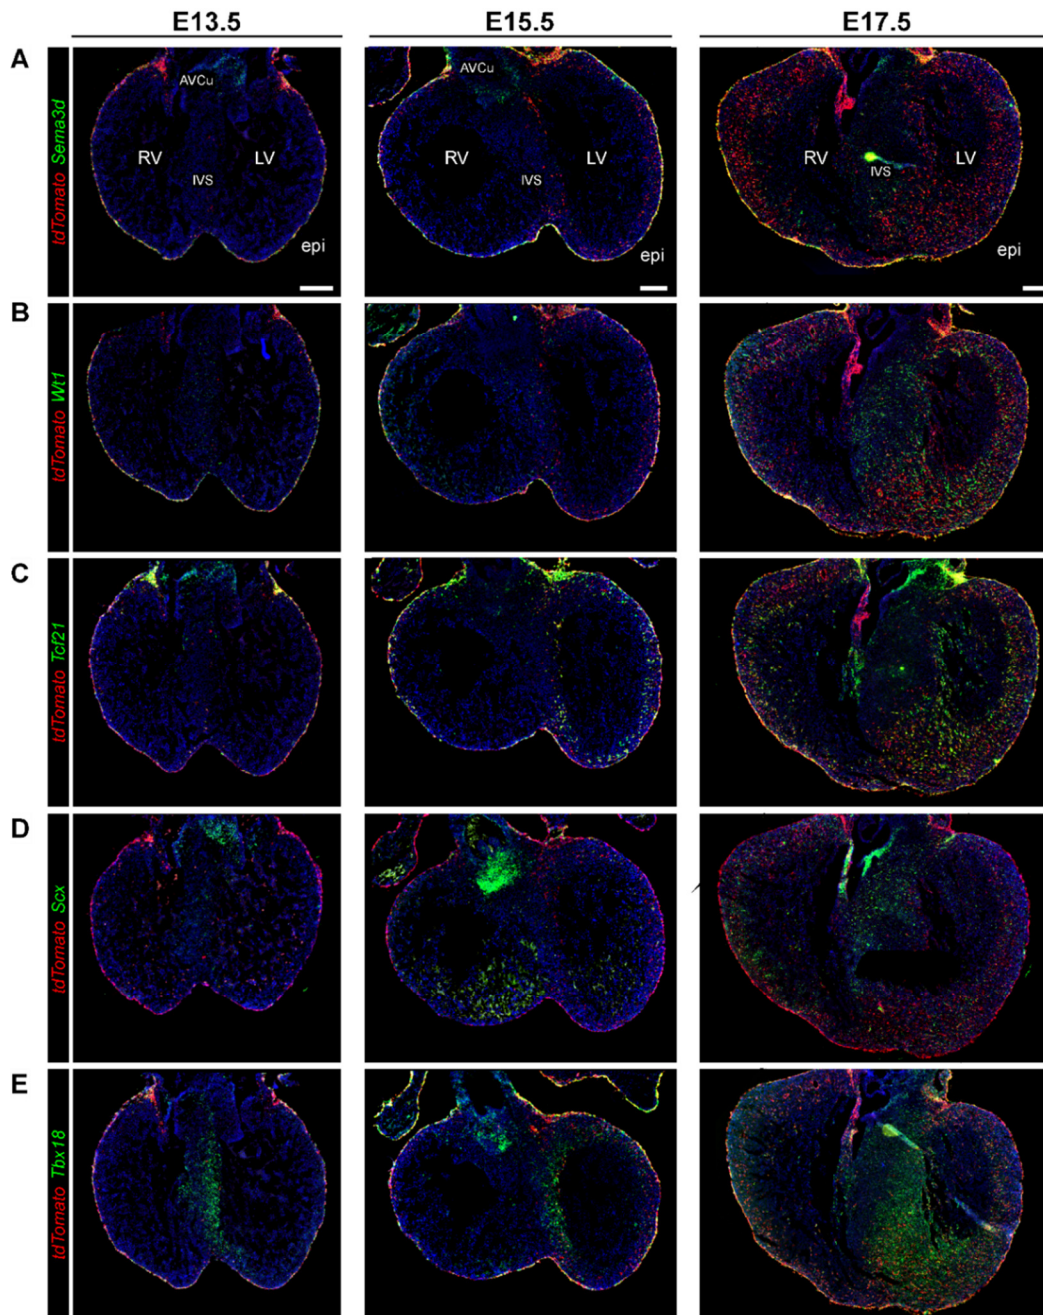

**Fig. S2. Non-specificity of the epicardial markers *Sema3d*, *Wt1*, *Tcf21*, *Scx*, and *Tbx18* at later stages of development.**

(A) RNA ISH co-staining of *Sema3d* (green) and *tdTomato* (red) at E13.5, E15.5, E17.5 shows overlap in the epicardium. *Sema3d* is also expressed in the atrioventricular cushion (AVCu) and in lymphatics. (B) RNA ISH co-staining of *Wt1* (green) and *tdTomato* (red) at E13.5, E15.5, E17.5 shows overlap in the epicardium. *Wt1* is also expressed in coronary endothelial cells starting E13.5. (C) RNA ISH co-staining of *Tcf21* (green) and *tdTomato* (red) at E13.5, E15.5, E17.5 shows overlap in the epicardium and in EPDCs. *Tcf21* is also expressed in AVCu and in interstitial fibroblasts. (D) RNA ISH co-staining of *Scx* (green) and *tdTomato* (red) at E13.5, E15.5, and E17.5 shows very low expression of *Scx* in the epicardium. *Scx* is highly expressed in the atrioventricular cushion (AVCu). (E) RNA ISH co-staining of *Tbx18* (green) and *tdTomato* (red) at E13.5, E15.5, E17.5 shows overlap in the epicardium. *Tbx18* is also expressed in cardiomyocytes in the septum and left ventricle and in vascular smooth muscle cells in the aorta. AVCu, atrioventricular cushion; RV, right ventricle; IVS, intraventricular septum; LV, left ventricle; epi, epicardium. Scale bars: 200 $\mu$ m in A.

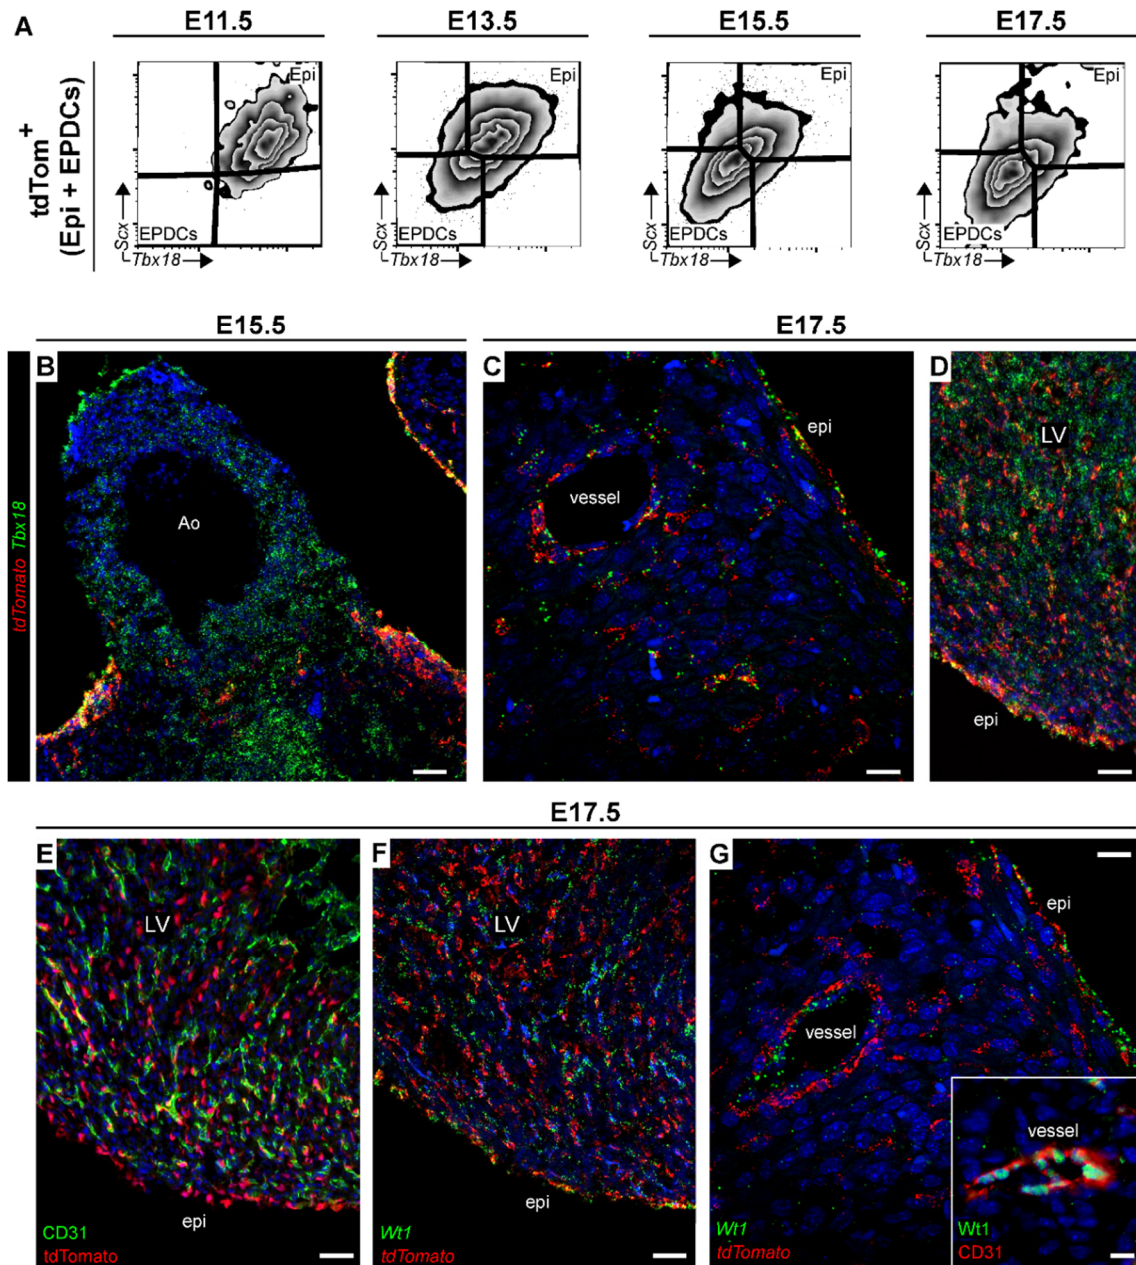

**Fig. S3. *Scx* and *Tbx18* expression decreases as epicardial cells transition to EPDCs and *Tbx18* and *Wt1* are expressed *de novo* in the coronary vasculature.**

(A) Flow cytometric analysis of *Scx* and *Tbx18* expression in tdTomato<sup>+</sup> cells, representing the epicardial lineage, shows downregulation of these markers in EPDCs over development. (B-C) RNA ISH co-staining of *Tbx18* (green) and *tdTomato* (red) reveals *Tbx18* expression in vascular smooth muscle cells derived from both non-epicardial and epicardial sources. (D) *Tbx18* is expressed in cardiomyocytes. (E) Co-immunostaining of CD31 and tdTomato shows no contribution of the epicardial lineage to coronary endothelium. (F-G) RNA-ISH co-staining of *Wt1* (green) and *tdTomato* (red) reveals *Wt1* expression in non-epicardial derived coronary endothelium cells. Co-immunostaining of CD31 and WT1 shows overlap in vessels. Epi, epicardium; EPDCs, epicardial-derived cells; Ao, aorta; LV, left ventricle. Scale bars: 50µm in B-G; 10µm in inset G.

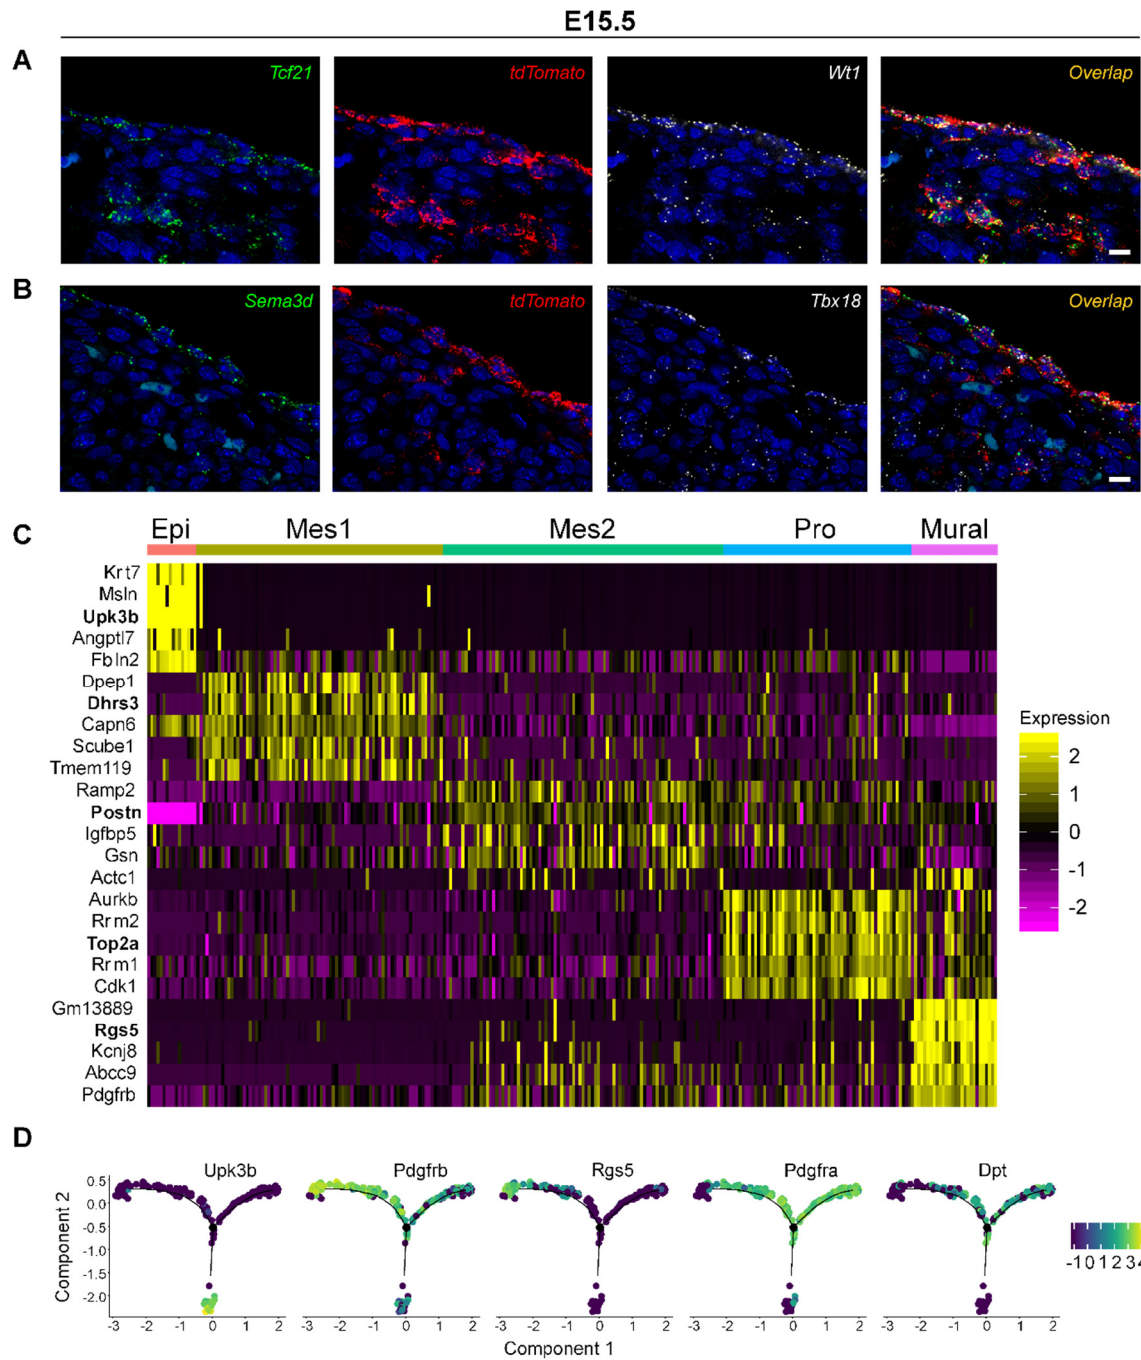

**Fig. S4. Expression of the selected epicardial markers at E15.5 and pseudotime representation of cell fate-associated genes.**

(A) RNA ISH co-staining of *Tcf21* (green), *tdTomato* (red) and *Wt1* (white) reveals overlap in the epicardial lineage, albeit *Tcf21* expression is low in the epicardium. (B) RNA ISH co-staining of *Sema3d* (green), *tdTomato* (red) and *Tbx18* (white) reveals overlap in the epicardium and reduced expression in EPDCs. (C) Heatmap of top 5 differentially expressed genes per cluster in the E15.5 scRNA-Seq. High expression is indicated in yellow. (D) Visualisation of cluster marker genes in pseudotime reveals one epicardial origin (*Upk3b*<sup>+</sup>) and two potential cell fates, one associated with mural genes (*Pdgfrb* and *Rgs5*) and one associated with mesenchymal/fibroblast fate (*Pdgfra* and *Dpt*).

**Table. S1: % Positive expressed (SED) in tdTom+ epicardial population at E11.5**

|                  | <i>Sema3d</i> | <i>Wt1</i>   | <i>Tcf21</i> | <i>Tbx18</i> | <i>Scx</i>   |
|------------------|---------------|--------------|--------------|--------------|--------------|
| Number of values | 3             | 3            | 3            | 3            | 3            |
| Minimum          | 97.30         | 96.00        | 94.20        | 94.90        | 81.60        |
| 25% Percentile   | 97.30         | 96.00        | 94.20        | 94.90        | 81.60        |
| Median           | 97.70         | 98.20        | 94.90        | 98.60        | 90.10        |
| 75% Percentile   | 98.90         | 98.20        | 97.40        | 99.50        | 94.40        |
| Maximum          | 98.90         | 98.20        | 97.40        | 99.50        | 94.40        |
| <b>Mean</b>      | <b>97.97</b>  | <b>97.47</b> | <b>95.50</b> | <b>97.67</b> | <b>88.70</b> |
| Std. Deviation   | 0.8327        | 1.270        | 1.682        | 2.438        | 6.514        |
| Std. Error       | 0.4807        | 0.7333       | 0.9713       | 1.408        | 3.761        |

**Table. S2: % Positive expressed (SED) *Sema3d* in *Wt1+Tcf21+* epicardial population**

|                  | E11.5        | E13.5        | E15.5        | E17.5        |
|------------------|--------------|--------------|--------------|--------------|
| Number of values | 3            | 3            | 2            | 2            |
| Minimum          | 98.20        | 99.50        | 99.20        | 96.20        |
| 25% Percentile   | 98.20        | 99.50        | 99.20        | 96.20        |
| Median           | 98.90        | 99.70        | 99.30        | 96.45        |
| 75% Percentile   | 99.40        | 99.80        | 99.40        | 96.70        |
| Maximum          | 99.40        | 99.80        | 99.40        | 96.70        |
| <b>Mean</b>      | <b>98.83</b> | <b>99.67</b> | <b>99.30</b> | <b>96.45</b> |
| Std. Deviation   | 0.6028       | 0.1528       | 0.1414       | 0.3536       |
| Std. Error       | 0.3480       | 0.08819      | 0.1000       | 0.2500       |

**Table. S3: % Positive expressed (SED) *Scx* in *Tbx18+Sema3d+* epicardial population**

|                  | E11.5        | E13.5        | E15.5        | E17.5        |
|------------------|--------------|--------------|--------------|--------------|
| Number of values | 3            | 3            | 2            | 2            |
| Minimum          | 82.80        | 88.70        | 97.10        | 93.20        |
| 25% Percentile   | 82.80        | 88.70        | 97.10        | 93.20        |
| Median           | 93.60        | 98.80        | 97.30        | 94.75        |
| 75% Percentile   | 94.00        | 99.00        | 97.50        | 96.30        |
| Maximum          | 94.00        | 99.00        | 97.50        | 96.30        |
| <b>Mean</b>      | <b>90.13</b> | <b>95.50</b> | <b>97.30</b> | <b>94.75</b> |
| Std. Deviation   | 6.354        | 5.890        | 0.2828       | 2.192        |
| Std. Error       | 3.668        | 3.400        | 0.2000       | 1.550        |

\*\*SED, Super-Enhanced Dmax Subtraction algorithm calculates percent positives when comparing histograms.
